1 **NAD<sup>+</sup> repletion with niacin counteracts cancer cachexia**

2 Marc Beltrà<sup>1,12</sup>, Noora Pöllänen<sup>2,12</sup>, Claudia Fornelli<sup>1</sup>, Kialiina Tonttila<sup>3,4</sup>, Myriam Y. Hsu<sup>5</sup>, Sandra Zampieri<sup>6,7</sup>,  
3 Lucia Moletta<sup>6</sup>, Paolo E. Porporato<sup>5</sup>, Riikka Kivelä<sup>3,4,8</sup>, Marco Sandri<sup>7,9</sup>, Juha J. Hulmi<sup>10</sup>, Roberta Sartori<sup>7,9,13</sup>,  
4 Eija Pirinen<sup>2,11,13</sup>, Fabio Penna<sup>1,13</sup>.

5  
6 <sup>1</sup>Experimental Medicine and Clinical Pathology Unit, Department of Clinical and Biological Sciences, University  
7 of Torino, Turin, Italy;

8 <sup>2</sup>Research Program for Clinical and Molecular Metabolism, Faculty of Medicine, University of Helsinki, Helsinki,  
9 Finland;

10 <sup>3</sup>Stem Cells and Metabolism Research Program, Faculty of Medicine, University of Helsinki, Helsinki, Finland;

11 <sup>4</sup>Faculty of Sport and Health Sciences, Exercise Physiology, University of Jyväskylä, Jyväskylä, Finland;

12 <sup>5</sup>Department of Molecular Biotechnology and Health Sciences, Molecular Biotechnology Center, University of  
13 Torino, Turin, Italy;

14 <sup>6</sup>Department of Surgery, Oncology and Gastroenterology, University of Padova, 35122 Padova, Italy;

15 <sup>7</sup>Department of Biomedical Sciences, University of Padova, 35122 Padova, Italy;

16 <sup>8</sup>Wihuri Research Institute, Helsinki, Finland;

17 <sup>9</sup>Veneto Institute of Molecular Medicine, 35129 Padova, Italy;

18 <sup>10</sup>Faculty of Sport and Health Sciences, NeuroMuscular Research Center, University of Jyväskylä, Jyväskylä,  
19 Finland;

20 <sup>11</sup>Research Unit for Internal Medicine, Faculty of Medicine, University of Oulu, Oulu, Finland

21 <sup>12</sup>These authors contributed equally: Marc Beltrà, Noora Pöllänen;

22 <sup>13</sup>These authors jointly supervised this work: Roberta Sartori, Eija Pirinen, Fabio Penna. e-mail:  
23 [roberta.sartori@unipd.it](mailto:roberta.sartori@unipd.it); [eija.pirinen@helsinki.fi](mailto:eija.pirinen@helsinki.fi); [fabio.penna@unito.it](mailto:fabio.penna@unito.it).

24 **SUMMARY**

25 Cachexia is a debilitating wasting syndrome and highly prevalent comorbidity in cancer patients. It manifests  
26 especially with energy and mitochondrial metabolism aberrations that promote tissue wasting. We recently  
27 identified nicotinamide adenine dinucleotide (NAD<sup>+</sup>) loss to associate with muscle mitochondrial dysfunction  
28 in cancer hosts. In this study we confirmed that depletion of NAD<sup>+</sup> and downregulation of *Nrk2*, an NAD<sup>+</sup>  
29 biosynthetic enzyme, are common features of different mouse models and cachectic cancer patients. Testing  
30 NAD<sup>+</sup> repletion therapy in cachectic mice revealed that NAD<sup>+</sup> precursor, vitamin B3 niacin, efficiently corrected  
31 tissue NAD<sup>+</sup> levels, improved mitochondrial metabolism and ameliorated cancer- and chemotherapy-induced  
32 cachexia. To examine NAD<sup>+</sup> metabolism in a clinical setting, we showed that the low expression of *NRK2* in  
33 cancer patients correlated with metabolic abnormalities underscoring the significance of NAD<sup>+</sup> in the  
34 pathophysiology of human cancer cachexia. Overall, our results propose a novel therapy target, NAD<sup>+</sup>  
35 metabolism, for cachectic cancer patients.

36 **Keywords** NAD<sup>+</sup>, niacin, vitamin B3, skeletal muscle, liver, cancer cachexia, *Nrk2*, mitochondria

## 37 INTRODUCTION

38 Cancer cachexia (CC) is a complex multifactorial syndrome resulting from both tumor-induced host  
39 adaptation and anti-cancer treatment side effects, being present in and worsening the outcome of more than  
40 half of all cancer patients. CC is clinically characterized by an involuntary loss of body weight mainly due to  
41 muscle wasting, with or without depletion of adipose tissue that impair patients' quality of life and survival<sup>1</sup>.  
42 Several energy metabolic abnormalities including mitochondrial dysfunction have been characterized in CC  
43 suggesting that targeting energy metabolism could be useful when designing novel anti-cachexia treatments<sup>2,3</sup>.  
44 Recently, our study on C26 adenocarcinoma bearing mice showed that the decline of mitochondrial oxidative  
45 phosphorylation (OXPHOS) occurred in parallel with depleted NAD<sup>+</sup> levels in the skeletal muscle<sup>4</sup>. Given that  
46 NAD<sup>+</sup> is an essential cofactor for mitochondrial energy production, alterations of its levels can affect  
47 mitochondrial homeostasis and subsequently the function of the tissue. In support of this notion, mRNA  
48 transcript levels of NAD<sup>+</sup> biosynthesis genes positively correlate with the expression of genes regulating  
49 muscle mitochondrial biogenesis, muscle mass growth and muscle regeneration in mice<sup>5,6</sup>. Recent rodent and  
50 human studies have reported NAD<sup>+</sup> depletion as a pathological hallmark for various muscle diseases including  
51 sarcopenia and mitochondrial myopathy<sup>6-8</sup>. NAD<sup>+</sup> depletion is typically caused by impaired NAD<sup>+</sup> biosynthesis,  
52 increased activities of NAD<sup>+</sup> degrading enzymes, a combination of both or changes in metabolic reactions  
53 relying on NAD<sup>+</sup>/NADH redox couple. In our above-mentioned work in C26-bearing mice, skeletal muscle  
54 NAD<sup>+</sup> loss was associated with a strong transcriptional downregulation of the NAD<sup>+</sup> biosynthetic enzyme  
55 *nicotinamide riboside kinase 2 (Nrk2)*. This salvage pathway enzyme metabolizes vitamin B3, nicotinamide  
56 riboside (NR), towards NAD<sup>+</sup> and is regulated by stress and alterations in the intracellular NAD<sup>+</sup> and energy  
57 supply<sup>9</sup>. NR has been previously published to alleviate cachexia in mice bearing the C26 tumor<sup>10</sup>, although the  
58 demonstration of NAD<sup>+</sup> replenishment is lacking. The clinical use of NR is challenged as the clinical trials  
59 published so far have failed to demonstrate positive outcomes on tissue energy metabolism<sup>11,12</sup>. In contrast,  
60 the other vitamin B3 form, niacin (NA), has a proven safety record in humans and it has been published to  
61 improve muscle mitochondrial and energy metabolism in patients with adult-onset mitochondrial myopathy<sup>13</sup>.  
62 Unsolved questions remain: 1) how common muscle NAD<sup>+</sup> depletion and *Nrk2* downregulation are in CC  
63 induced by distinct tumors, 2) is NAD<sup>+</sup> metabolism disturbed in other tissues beyond the skeletal muscle, and  
64 3) can NAD<sup>+</sup> repletion with NA mitigate the symptoms of cancer cachexia.

65 The current study aimed to better characterize NAD<sup>+</sup> and energy metabolism impairments in CC and  
66 examine the potential therapeutic role of NA supplementation. Skeletal muscle NAD<sup>+</sup> deficiency was detected  
67 in mice with severe CC, whereas muscle *Nrk2* loss was observed in several preclinical CC models and

68 validated in cancer patient muscle biopsies. In addition, the depletion of all NAD metabolites was observed in  
69 the liver of mice suffering from acute or chronic CC. NA corrected NAD<sup>+</sup> deficiency and increased mitochondrial  
70 biogenesis in both skeletal muscle and liver of cachectic mice, partially restoring muscle mass loss and energy  
71 metabolism changes. Thus, our findings propose that *Nrk2* repression and NAD<sup>+</sup> metabolism aberrations are  
72 prevalent features of CC. Correcting NAD<sup>+</sup> metabolism has a protective role in maintaining adequate energy  
73 homeostasis and preventing cachexia in tumor-bearing animals.

74

## 75 RESULTS

### 76 Impaired skeletal muscle NAD<sup>+</sup> metabolism is a common feature of experimental cancer cachexia

77 In this study, an exacerbation of muscle NAD<sup>+</sup> depletion was observed in C26-bearing animals treated  
78 with Folfox chemotherapy (C26-F, Fig. 1a) in comparison to our previous publication in chemotherapy-naive  
79 C26-mice (NAD<sup>+</sup> decrease: 30,8% versus 12,5%)<sup>4</sup>. Consistently, a reduction in NAD<sup>+</sup> was observed also in  
80 the skeletal muscle of KPC tumor-bearing mice (Fig. 1a), a CC model representative of pancreatic ductal  
81 adenocarcinoma<sup>14</sup>. In order to better model CC, we assessed NAD<sup>+</sup> content in the skeletal muscle of Villin-  
82 Cre/*Msh2*<sup>loxP/loxP</sup> (VCM) mice that slowly and spontaneously develop neoplasms due to the conditional knock-  
83 out of the mismatch repair gene *Msh2* in the enterocytes of the intestinal mucosa<sup>15</sup> (a characterization of this  
84 new cachexia model is provided in Supplementary Fig. 1). Although presenting with significant anemia, body  
85 weight loss and muscle wasting due to tumor progression is moderate in the VCM model compared to aged-  
86 matched *Msh2*<sup>loxP/loxP</sup> mice (controls; Supplementary Fig. 1a-c), supporting the idea of a milder and more  
87 chronic model of CC. As opposed to the previous severe models of CC, skeletal muscle NAD<sup>+</sup> levels were not  
88 significantly reduced in VCM mice (Fig. 1a).

89 In chemotherapy-naive C26 tumor-bearing mice, decreased NAD<sup>+</sup> levels associated with the  
90 repression of the NAD<sup>+</sup> biosynthetic gene *Nrk2*<sup>4</sup>. Consistently, cachectic mice showed downregulation of  
91 muscle *Nrk2* gene expression in both C26-F and VCM models compared to controls, while a trend towards  
92 *Nrk2* reduction was detected in KPC mice (Fig. 1b). Remarkably, NRK2 protein levels were nearly undetectable  
93 in muscle homogenates of C26-F and VCM mice when compared to their respective control group (Fig. 1c-d).  
94 Altogether, these data demonstrate that skeletal muscle NAD<sup>+</sup> content is depleted in severe CC and that *Nrk2*  
95 downregulation is a common feature of experimental CC independently from the severity of the syndrome.

96

97

98 **Muscle *NRK2* loss occurs in human cancer cachexia and metabolome profiling reveals a unique**  
99 **signature of low *NRK2*-expressing skeletal muscle.**

100 To validate the preclinical data in humans, *NRK2* expression was assessed in skeletal muscle biopsies  
101 from colorectal and pancreatic cancer patients and compared to healthy subjects. The samples originate, with  
102 some additions, from a previous study<sup>16</sup> (patient characteristics are summarized in Supplementary Table 1).  
103 *NRK2* expression decreased in patients classified as pre-cachectic and showed a further pronounced  
104 downregulation in cachectic patients (Fig. 2a) confirming that *NRK2* loss is a novel common alteration in CC.  
105 To examine the relationship between *NRK2* loss and muscle metabolism in CC, we selected 10 patients with  
106 the highest (comparable to healthy controls) and 10 with the lowest (almost 10-fold decrease) *NRK2*  
107 expression that did not differ in terms of body weight loss (Fig. 2b-c). Moreover, *NRK2* expression levels were  
108 independent from muscle mass and wasting, as no association was found with macroscopic clinical features  
109 of the current cachexia diagnostic criteria, mainly based on body weight loss and sarcopenia (Supplementary  
110 Table 2-3). A metabolomic characterization revealed a peculiar signature in the low *NRK2* expressing muscles  
111 clearly distinguished from high *NRK2* and healthy counterparts (Fig. 2d). Low *NRK2* samples showed an  
112 accumulation of glycolysis intermediates, nucleotides and amino acids, indicative of impaired energy  
113 metabolism and hypercatabolic state (Fig. 2e-h). This trait can be partially observed also in the sera of the  
114 same individuals (Fig. 2i,j), suggesting that muscle energy failure and protein hypercatabolism could be  
115 diagnosed with minimally invasive procedures.

116

117 **Niacin rescues skeletal muscle NAD<sup>+</sup> levels, ameliorates muscle wasting and improves protein**  
118 **metabolism in experimental cancer cachexia.**

119 NRKs catalyze the utilization of NAD<sup>+</sup> precursor NR via the salvage pathway. In the skeletal muscle,  
120 *Nrk2* is the most expressed isoform in both BALB/c and C57BL/6 strains as compared to *Nrk1* (Supplementary  
121 Fig. 2a). Considering the *Nrk2* repression in CC and the lack of a simple, translatable tool to correct *Nrk2*  
122 expression, we decided to use the NAD<sup>+</sup> booster NA, a precursor that is utilized for NAD<sup>+</sup> biosynthesis through  
123 the Preiss-Handler pathway thus bypassing NRK2<sup>17</sup>. C26-F animals were treated with a daily dose (150 mg/kg)  
124 of NA starting from day 4 after C26 implantation until day 28 (Fig. 3a). In addition to NAD<sup>+</sup> depletion (Fig. 1a),  
125 C26-F mice presented with a significant decrease of NADH and NADPH levels while NADP levels were similar  
126 in comparison to controls (Supplementary Fig. 2b). Besides *Nrk2* loss, C26-F mice showed an overall  
127 repression of genes involved in NAD<sup>+</sup> biosynthesis via the salvage and Preiss-Handler pathways  
128 (Supplementary Fig. 2c) and enhanced enzyme activity of poly(ADP-ribose)polymerases (PARPs), one of the

129 main consumers of cellular NAD<sup>+</sup> pool operating for example in DNA repair (Supplementary Fig. 2d).  
130 Interestingly, NA increased skeletal muscle NAD<sup>+</sup> and NADP<sup>+</sup> concentrations almost to the control levels and  
131 slightly impacted on NADH and NADPH levels (Fig. 3b, Supplementary Fig. 2b). Moreover, NA  
132 supplementation improved cachexia symptoms by counteracting the loss of body weight and muscle mass and  
133 partially rescuing grasping strength (Fig. 3c-e, Supplementary Fig. 2e). When tested *in vitro*, NA increased  
134 C26 cell proliferation, but this effect was neutralized when administered together with oxaliplatin or 5-  
135 fluorouracil (Supplementary Fig. 2f). Additionally, NA increased the number of death cells and partially  
136 potentiated oxaliplatin toxicity (Supplementary Fig. 2g). *In vivo*, tumor mass was not significantly affected by  
137 NA in C26-F mice (Supplementary Fig. 2h). Consistent with our previous report<sup>18</sup>, C26-F mice presented with  
138 decreased skeletal muscle protein synthesis, increased ratio of the active LC3B isoform (LC3B-II; Fig. 3f-h)  
139 and AMPK phosphorylation (Fig. 3f-i), suggestive of increased autophagy and energy shortage, respectively.  
140 Interestingly, both protein synthesis and LC3B-II accumulation were in part rescued by NA (Fig. 3f-h), while  
141 AMPK activation was partially prevented (Fig. 3f,i).

142 To further explore the impact of NA in a more chronic model of CC presenting with *Nrk2* loss, VCM  
143 mice were treated with NA for 28 days (Fig. 3j). In line with the preserved NAD<sup>+</sup> content in VCM mice (Fig. 1a),  
144 NAD metabolites, the expression of NAD<sup>+</sup> biosynthetic genes and PARP activity did not differ between control  
145 and VCM groups (Supplementary Fig. 2i-k). NA supplementation minimally impacted on skeletal muscle NAD<sup>+</sup>  
146 and other NAD metabolites (Fig. 3k, Supplementary Fig. 2i). Nonetheless, NA partially protected VCM mice  
147 from muscle mass loss (Fig. 3l-n), preventing muscle autophagosome accumulation (Fig. 3o,p) and increased  
148 expression of E3 ubiquitin ligases, autophagy and mitophagy genes (Supplementary Fig. 2l-n). Overall, NA  
149 showed beneficial effects on CC by preventing muscle loss and induction of autophagy markers both in severe  
150 and mild CC models.

151

## 152 **Niacin improves skeletal muscle mitochondrial biogenesis in experimental cancer cachexia.**

153 Muscle mitochondrial dysfunction has gained importance in recent years as a crucial feature of CC<sup>19</sup>.  
154 In the current experiments, the skeletal muscle of C26-F mice presented with reduced protein levels of the  
155 main activator of mitochondrial biogenesis PGC-1 $\alpha$  (Fig 4a, b), a decline in mitochondrial DNA (mtDNA)  
156 amount (Fig. 4c), and reduced expression of the mitochondrial mass marker, TOMM20, and several subunits  
157 of the mitochondrial oxidative phosphorylation complexes (Fig 4a, d-e). Additionally, several genes involved in  
158 mitochondrial biogenesis were downregulated (Supplementary Fig. 2o), whereas PINK1 protein, a marker of  
159 mitochondrial damage and depolarization<sup>20</sup>, accumulated in the skeletal muscle of C26-F mice (Fig 4a, f). NA

160 increased the abundance of mtDNA and preserved PGC-1 $\alpha$ , TOMM20 and OXPHOS complex subunit protein  
161 levels (Fig. 4a-e) without impacting on PINK1 accumulation (Fig 4a, f). No transcriptional induction of genes  
162 crucial for mitochondrial health and biogenesis was observed upon NA indicating (Supplementary Fig. 2o) that  
163 NA's effect on mitochondrial metabolism is mediated via post-transcriptional mechanism.

164 Similarly to the C26-F model, the skeletal muscle of VCM mice showed a robust decrease in PGC-1 $\alpha$   
165 protein levels (Fig. 4g,h) and significant reductions in TOMM20 and the OXPHOS complex subunits MTCO1  
166 (CIV) and SDHB (CII) (Fig. 4g,j-k), although no significant changes in mtDNA abundance were observed when  
167 compared to controls (Fig. 4i). Yet no accumulation of PINK1 was observed in the muscle of VCM mice (Fig.  
168 4g,l). NA rescued PGC-1 $\alpha$  levels (Fig. 4g,h), increased mtDNA content (Fig. 4i), and partially improved  
169 TOMM20 and OXPHOS complex subunit MTCO1 (CIV) and NDUF88 (CI) (Fig. 4g,j-k). As in C26-F mice, VCM  
170 mice showed downregulation of genes promoting mitochondrial biogenesis, although in this case, NA partially  
171 corrected the expression of *Erra* (Supplementary Fig. 2p). Overall, NA treatment ameliorates skeletal muscle  
172 mitochondrial status in two distinct models of experimental CC.

173

#### 174 **Niacin corrects liver NAD<sup>+</sup> deficiency and partially improves hepatic mitochondrial alterations.**

175 CC is a complex metabolic disease where the liver has a crucial role in the control of systemic energy  
176 and glucose metabolism<sup>2</sup>. As the liver also contributes to the systemic regulation of NAD<sup>+</sup> synthesis and  
177 recycling<sup>21</sup>, we examined how CC and NA treatment influence liver condition and NAD<sup>+</sup> metabolism in C26F  
178 and VCM mice.

179 C26F mice showed liver hypertrophy with depleted hepatic glycogen and total glutathione levels  
180 (Supplementary Fig. 3a-d), together with a severe decline in blood glucose levels (Supplementary Fig. 3e). NA  
181 supplementation slightly improved total glutathione content and glycemia whereas NA had no significant  
182 effects on liver size or hepatic glycogen levels (Supplementary Fig. 3a-e). All hepatic NAD metabolites (NAD<sup>+</sup>,  
183 NADH, NADP<sup>+</sup> and NADPH) were dramatically reduced in C26-F mice as compared to controls (Fig. 5a). NAD<sup>+</sup>  
184 depletion likely originated from a strong downregulation of NAD<sup>+</sup> biosynthetic enzymes of salvage and Preiss-  
185 Handler pathways including the liver isoform of nicotinamide riboside kinase, *Nrk1* (Supplementary Fig. 3f),  
186 not from the enhanced NAD<sup>+</sup> consumption via PARPs (Supplementary Fig. 3g). NA restored all hepatic NAD  
187 metabolite concentrations in C26-F mice (Fig. 5a). The livers of C26-F mice showed increased protein  
188 synthesis as opposed to skeletal muscle, even with the accumulation of autophagosomes (LC3B-II). Neither  
189 protein synthesis nor LC3B levels were influenced by NA (Supplementary Fig. 3h-j). Although no changes in  
190 liver mtDNA amount were detected (Fig. 5b), a decline in the protein expression of TOMM20 and OXPHOS

191 complex subunits was observed in VCM compared to controls (Fig. 5c,d). Similarly to skeletal muscle, a  
192 reduction of transcripts was observed for the activators of mitochondrial biogenesis *Tfam* and *Erra* in C26-F  
193 mice (Supplementary Fig. 3k). Interestingly, NA-treatment increased mtDNA amount above control levels and  
194 partially rescued the expression of TOMM20 and the OXPHOS II, III and IV complex subunits (Fig. 5b-d). No  
195 transcriptional induction of mitochondrial biogenesis markers occurred in the liver after NA supplementation  
196 (Supplementary Fig. 3k).

197 As in C26-F mice, VCM mice showed hepatomegaly (Supplementary Fig. 3l) and a dramatic reduction  
198 in hepatic NAD<sup>+</sup>, NADH, NADP<sup>+</sup> and NADPH content as compared to controls (Fig. 5e). The expression of  
199 NAD<sup>+</sup> biosynthetic genes and PARP activity remained fairly stable (Supplementary Fig. 3m,n) in the liver. NA  
200 supplementation, not affecting liver size, restored hepatic NAD metabolite concentrations in VCM mice (Fig.  
201 5e, Supplementary Fig. 3l). Hepatic mtDNA amount and protein expression of TOMM20 did not differ between  
202 VCM and control mice (Fig. 5f-h). Yet protein expression of OXPHOS complex III, IV and V subunits were  
203 significantly decreased in tumor-bearing animals (Fig. 5g,h). NA supplementation did not influence TOMM20  
204 expression but it increased mtDNA amount and ATP5 (CV subunit) expression as compared to non-treated  
205 VCM mice (Fig. 5f-h). The transcription of mitochondrial biogenesis markers partially decreased in VCM mice  
206 while NA only improved the expression of *Tfam* (Supplementary Fig. 3o). In conclusion, these findings reveal  
207 that CC is characterized by the deficiency of hepatic NAD metabolites and mitochondrial abnormalities that  
208 are partially restored boosting NAD<sup>+</sup> metabolism with NA.

209

## 210 DISCUSSION

211 Disturbed skeletal muscle NAD<sup>+</sup> metabolism has recently emerged as a molecular determinant of  
212 murine CC<sup>4</sup>. Our study reveals that the downregulation of muscle NAD<sup>+</sup> biosynthetic enzyme *NRK2* is a  
213 common feature of murine and human CC, allowing to identify patients with metabolic disturbances.  
214 Importantly, rescuing NAD<sup>+</sup> levels protects from cancer- and chemotherapy-induced muscle wasting in mice.

215 NAD<sup>+</sup> depletion and perturbed NAD<sup>+</sup> biosynthesis are well established pathophysiological factors of  
216 diseases characterized by muscle mitochondrial dysfunction and disturbed energy metabolism, such as  
217 mitochondrial myopathies and sarcopenia<sup>8,13</sup>. As summarized in figure 6, muscle NAD<sup>+</sup> depletion occurs mainly  
218 in severe CC mouse models. In contrast, the downregulation of *Nrk2* was detected in the skeletal muscle in  
219 all mouse models including the milder and chronic VCM model of CC, not presenting with NAD<sup>+</sup> depletion.  
220 This finding suggests that *Nrk2* loss may precede the development of NAD<sup>+</sup> metabolism disturbances and  
221 muscle loss. Consistently, we show for the first time that cancer patients exhibit muscle *NRK2* repression (Fig.



222 6), already in pre-cachectic state and exacerbated in overt cachexia. As muscle *NRK2* loss occurred  
223 independently from CC status, *i.e.* body weight loss and/or sarcopenia, this emphasizes that NAD<sup>+</sup> metabolism  
224 could be a viable target for early interventions to improve cancer patient health before overt or refractory CC  
225 ensue. In addition, our results highlight the inability of the present CC assessment procedures to detect muscle  
226 or systemic metabolic abnormalities that strongly impair cancer patient outcome and quality of life.

227 Previous mouse studies have demonstrated that *Nrk2* plays a redundant role in basal muscle NAD<sup>+</sup>  
228 biosynthesis<sup>22,23</sup>. In contrast, *Nrk2* is typically upregulated<sup>22,23</sup> during metabolic energy stress and NAD<sup>+</sup> deficiency  
229 to support NAD<sup>+</sup> production<sup>23–25</sup>. This is contrary to our findings of consistent *Nrk2* downregulation in CC,  
230 suggesting that either the skeletal muscle has impaired adaptation to NAD<sup>+</sup> deficiency or that *Nrk2* loss plays  
231 a primary role in determining the altered NAD<sup>+</sup> and energy metabolism in CC. In line with the latter notion, low  
232 muscle *NRK2* expression was associated with metabolite alterations in both skeletal muscle and serum of  
233 cancer patients, highlighting the future possibility to set up simple and fast venous blood sampling to diagnose  
234 energy metabolism disturbances in CC patients. Overall, our results indicate that muscle *NRK2* loss is a  
235 common feature of murine and human CC and that *NRK2* might have a disease-specific role in the regulation  
236 of energy homeostasis.

237 Beneficial effects of increasing intracellular NAD<sup>+</sup> levels have been demonstrated in various muscle  
238 and metabolic diseases<sup>13,26–29</sup>. In agreement with these previous studies, NA partially rescued the depleted  
239 NAD<sup>+</sup> metabolites in the skeletal muscle, counteracted muscle wasting and improved muscle function and  
240 protein synthesis in C26-F mice. Although the VCM mice showed no depletion of muscle NAD metabolites at  
241 baseline, NA restored muscle mass and normalized autophagic markers. These improvements possibly  
242 originate, especially in C26-F mice, from a better maintenance of mitochondrial energy metabolism rather than  
243 NA having a direct effect on protein metabolism. Consequently, the energized muscles have a lesser need for  
244 muscle degradation to fulfill systemic energy demands. In both CC models, NA likely increased mitochondrial  
245 biogenesis via a PGC-1 $\alpha$ -mediated mechanism. A similar positive effect on muscle mitochondrial metabolism  
246 has been observed upon NAD<sup>+</sup> boosting therapies in several rodent studies<sup>7</sup>. In addition, in a recent human  
247 study from our group, NA improved muscle mitochondrial biogenesis and muscle strength in healthy individuals  
248 and patients with mitochondrial myopathy<sup>13</sup>. Collectively, our murine study indicates that NA has a therapeutic  
249 potency on CC regardless of the muscle NAD<sup>+</sup> content, that may vary according to the severity of CC and/or  
250 the exposure to chemotherapy.

251 Considering that the liver performs a wide range of energetically demanding processes, it has been  
252 suggested that hepatic metabolism requires proper NAD<sup>+</sup> homeostasis<sup>30–32</sup>. In line, dysregulated

253 mitochondrial, lipid and glucose metabolism are associated with hepatic NAD<sup>+</sup> deficiency<sup>33,34</sup>. Here we provide  
254 the first evidence that both severe and mild CC mouse models exhibit pronounced hepatic NAD metabolite  
255 depletion. The underlying cause for hepatic NAD<sup>+</sup> deficiency may be related to perturbed NAD<sup>+</sup> biosynthesis,  
256 at least in C26-F mice. These findings revealed that NAD<sup>+</sup> metabolism aberrations are rather of systemic  
257 nature in CC than specifically distinctive for skeletal muscle. Despite NA effectively rescued hepatic NAD  
258 metabolite levels and muscle wasting in both models, with only a partial restoration effect on liver mitochondrial  
259 metabolism, a causal relationship cannot be established between liver dysfunction and muscle wasting in the  
260 currently adopted murine CC models, suggesting that the beneficial impact of NA on skeletal muscle is not  
261 likely secondary to the rescue of liver metabolism.

262 In conclusion, our findings encourage investigating NRK2-targeted therapeutic options to improve  
263 disturbed energy metabolism in CC. In addition, the results demonstrate that NA has a therapeutic effect on  
264 both cancer- and chemotherapy-induced cachexia in mice. The effectiveness of NA in variable experimental  
265 conditions that reflect the broad human spectrum of CC increases the translational value of our findings.  
266 Although deeper insight on NAD<sup>+</sup> metabolism impairments in different conditions of human CC are still  
267 required, our study highlights the necessity of NAD<sup>+</sup> to support energy metabolism in CC and paves the way  
268 for the development of novel vitamin B3-based therapies to effectively target the multifaceted aspects of CC.

269

## 270 **MATERIALS AND METHODS**

271 All the reagents used in this work were obtained from Merck-MilliporeSigma (St. Louis, MO, USA)  
272 unless differently indicated.

273

### 274 **Animals and experimental design**

275 Experimental animals were cared for in compliance with the Italian Ministry of Health Guidelines and  
276 the Policy on Humane Care and Use of Laboratory Animals (NRC, 2011). The experimental protocols were  
277 approved by the Bioethical Committee of the University of Torino (Torino, Italy) and the Italian Ministry of  
278 Health (Aut. Nr. 579/2018-PR). The animals were maintained on a regular dark-light cycle of 12:12 hours with  
279 controlled temperature (18-23°C) and free access to food and water during the whole experimental period.  
280 B6.Cg-Tg(Vil1-cre)997Gum/J (Villin-Cre) and B6.Cg-Msh2<sup>tm2.1Rak</sup>/J (Msh2<sup>loxP</sup>), mice were purchased from The  
281 Jackson Laboratory (Bar Harbor, CA, USA) and were crossed to obtain the Villin-Cre/Msh2<sup>loxP/loxP</sup> (VCM)  
282 offspring, leading to the conditional knock-out of the Msh2 gene in the enterocytes of the intestinal mucosa,  
283 accelerating the formation of intestinal adenomas/adenocarcinomas<sup>15</sup>. The presence of each transgenic

284 construct was assessed through Melt Curve Analysis (RT-qPCR) using the following primers: Villin-Cre  
285 (forward: 5'-TTCTCCTCTAGGCTCGTCCA-3' and reverse: 5'-CATGTCCATCAGGTTCTTGC-3') and *Msh2*<sup>loxP</sup>  
286 (wild-type: 5'-GATGATGTGTGAAGCCTGCAT-3', mutant: 5'-CCTCTTGAGGGGAATTGAAGT-3' and  
287 common: 5'-AGGTAAAAACCAGAGCCTCAACT-3').

288 Two distinct experiments were performed in this study:

289 Animal experiment 1: 21 6-month-old wild-type BALB/c mice weighing approximately 20g (Charles  
290 River, Wilmington, MA) were divided into 3 groups ( $n=7$ ): healthy controls, C26-F and C26-F+NA. Females  
291 were used to avoid the fighting characteristic among male cagemates subjected to severe cachexia protocols.  
292 C26-F mice were subcutaneously inoculated with  $5 \times 10^5$  Colon26 (C26) carcinoma cells on the back and  
293 treated with Folfox chemotherapy (6 mg/Kg oxaliplatin, 25 mg/Kg 5-fluorouracil, 90 mg/Kg leucovorin) at days  
294 7, 14 and 21 after tumor inoculation. Mice of the C26-F + NA group were administered a daily dose of NA (150  
295 mg/kg dissolved in tap water) by gavage. Healthy controls received an equal saline injection excluding the cell  
296 inoculum and were daily treated with tap water. Grasping strength was assessed on day 0 and the day after  
297 every Folfox administration (days 8, 15 and 22). Oral treatments with NA started 4 days after tumor injection.  
298 At day 28 post-C26 implantation, mice were injected with an intraperitoneal dose of 40  $\mu\text{mol/Kg}$  puromycin 30  
299 min prior to euthanasia in order to assess the relative rate of protein synthesis (SUnSET methodology)<sup>35</sup>. The  
300 amount of puromycin incorporated into nascent peptides was detected by western blotting, using a specific  
301 anti-puromycin antibody.

302 Animal experiment 2: one-year-old male VCM mice ( $n=6$ ) were treated with a daily dose of NA (150  
303 mg/kg, up to 4.5 mg/day) by gavage for 28 days. Age and gender-matched VCM mice ( $n=8$ ) and *Msh2*<sup>loxP/loxP</sup>  
304 mice ( $n=8$ ) were used as non-treated tumor-bearers and healthy controls, respectively.

305 Muscle samples from KPC mice derive from a previous animal experiment<sup>14</sup>. Briefly, 8-week-old  
306 wild-type C57BL/6 male mice were subcutaneously inoculated with  $0.7 \times 10^6$  cells KPC cells ( $n=6$ ) and animals  
307 were terminated 5 weeks after tumor implantation. Healthy age-matched C57BL/6 mice were used as controls  
308 ( $n=6$ ).

309 In all experimental protocols, body weight and food intake were monitored every other day, and the  
310 animals were daily examined for signs of distress. At the endpoint, the mice were anesthetized with 2%  
311 isoflurane in O<sub>2</sub>, blood was collected by cardiac puncture and euthanasia was performed by means of cervical  
312 dislocation. Several tissues were excised, weighed, frozen in liquid nitrogen and stored at -80°C for further  
313 analyses.

314

## 315 **Collection of human skeletal muscle and serum samples**

316 The human samples originate, with some additions, from a previous study<sup>16</sup>. From 2015 to 2020 we  
317 enrolled consecutive patients with colorectal or pancreatic cancer and control patients undergoing surgery for  
318 benign diseases at the 3rd Surgical Clinic of the University Hospital of Padova. The research project was  
319 approved by the Ethical Committee for Clinical Experimentation of Padova (protocol number 3674/AO/15). All  
320 patients joined the protocol according to the guidelines of the Declaration of Helsinki and the written informed  
321 consent was obtained from participants. The muscle biopsy was performed at the time of the planned surgery  
322 by a cold section of a *rectus abdominalis* fragment (1x0.5 cm) immediately frozen and conserved in liquid  
323 nitrogen for gene expression analysis and metabolome profiling. Serum samples were obtained from blood  
324 samples retrieved prior to any surgical manipulation. Demographics and clinical data, including medications  
325 and comorbidities noted as having potential confounding effects on skeletal muscle homeostasis<sup>16</sup> were  
326 collected from all patients (Supplementary Table 1). Cancer patients were classified as cachectic in cases of  
327 >5% weight loss in the 6 months preceding surgery, >2% weight loss with either body mass index (BMI) <20  
328 or low muscle mass defined by the skeletal muscle index (SMI) cut-offs described by Martin *et al*<sup>16</sup>. SMI values  
329 were quantified using the preoperative CT scans as previously described<sup>16</sup>. Based on gene expression  
330 analysis, we selected 10 cancer patients with the highest (comparable to healthy controls) and 10 with the  
331 lowest (almost 10-fold decrease) *NRK2* levels (Supplementary Table 2, 3). We performed metabolome profiling  
332 of muscle and serum samples in these two subgroups.

333

## 334 **Metabolome analysis**

335 About 10 mg of skeletal muscle or 50  $\mu$ l of serum were used for metabolite extraction and analysis.  
336 The samples were flash frozen upon collection and sent for further processing to the Metabolomics Expertise  
337 Center, VIB Center for Cancer Biology, KULeuven Department of Oncology, Leuven, Belgium. The extraction  
338 was performed adding 99 or 19 volumes (for muscles or sera, respectively) of 80% methanol, containing 2  $\mu$ M  
339 d27 myristic acid as internal standard. The mixture was centrifuged at 20.000 x g for 15 min at 4°C to precipitate  
340 proteins and insoluble material, the supernatant transferred to a fresh new tube. 10  $\mu$ l of each sample was  
341 loaded into a Dionex UltiMate 3000 LC System (Thermo Scientific Bremen, Germany) equipped with a C-18  
342 column (Acquity UPLC -HSS T3 1.8  $\mu$ m; 2.1 x 150 mm, Waters) coupled to a Q Exactive Orbitrap mass  
343 spectrometer (Thermo Scientific) operating in negative ion mode. A step gradient was carried out using solvent  
344 A (10 mM TBA and 15 mM acetic acid) and solvent B (100% methanol). The gradient started with 5% of solvent  
345 B and 95% solvent A and remained at 5% B until 2 min post injection. A linear gradient to 37% B was carried

346 out until 7 min and increased to 41% until 14 min. Between 14 and 26 minutes the gradient increased to 95%  
347 of B and remained at 95% B for 4 minutes. At 30 min the gradient returned to 5% B. The chromatography was  
348 stopped at 40 min. The flow was kept constant at 0.25 mL/min at the column was placed at 40°C throughout  
349 the analysis. The MS operated in full scan mode (m/z range: [70.0000-1050.0000]) using a spray voltage of  
350 4.80 kV, capillary temperature of 300 °C, sheath gas at 40.0, auxiliary gas at 10.0. The AGC target was set at  
351 3.0E+006 using a resolution of 140000, with a maximum IT fill time of 512 ms. Data collection was performed  
352 using the Xcalibur software (Thermo Scientific). The data were obtained by integrating the peak areas (EI-  
353 Maven – Polly - Elucidata). Data analysis was performed using the free online resource  
354 <https://www.metaboanalyst.ca/> version 5.0.

355

### 356 **Liver glycogen and glutathione content**

357 Liver glycogen concentration was assessed using a commercially available system (MAK016  
358 Glycogen assay Kit). Briefly, liver fragments of about 50 mg were cold homogenized in water (10% w/vol) with  
359 a bead homogenizer (Bullet Blender, New Advance, Troy, NY, USA), boiled for 5' and centrifuged for 5' at  
360 13,000 x g. The supernatant was collected and diluted 100-fold before adding 10 µl to a 96 well plate. The  
361 assay was performed following manufacturer's instructions and using a glycogen titration curve in order to  
362 extrapolate quantitative data.

363 Glutathione was determined as previously described<sup>37</sup>, with slight modifications<sup>38</sup>. Briefly, liver  
364 fragments of about 50 mg were cold homogenized in water (10% w/vol) with a bead homogenizer,  
365 deproteinized on ice using 5% metaphosphoric acid and centrifuged at 15,000 x g for 2 min. The supernatants  
366 were treated with 4 M triethanolamine to reach pH 7.4. GSH concentration was determined after 2 min  
367 incubation with 5,50-dithiobis-2-nitrobenzoic acid (DTNB) by measuring the production of 50-thio-2-  
368 nitrobenzoic acid (TNB) at 412 nm on a 96-well microplate reader. Suitable volumes of diluted glutathione  
369 reductase (6 U/mL) and of NADPH (4 mg/mL) were then added to evaluate total glutathione level (GSH +  
370 GSSG). GSSG content was calculated by subtracting GSH content from total glutathione levels.

371

### 372 **Assessment of NAD metabolite levels**

373 NAD<sup>+</sup>, NADH and the phosphorylated metabolites NADP<sup>+</sup> and NADPH were measured from pulverized  
374 *gastrocnemius* (GSN) muscle and liver with a slightly modified conventional colorimetric method<sup>4</sup> (for further  
375 information, see <https://www.nadmed.fi/>). Metabolite levels were normalized to tissue mass used for analysis  
376 or the total protein content of the sample.

377 **PARP activity**

378 PARP activity was analyzed from pulverized liver and *gastrocnemius* (GSN) muscle utilizing HT Colorimetric  
379 PARP/Apoptosis Assay Kit (R&D Systems, Minneapolis, MN, USA) according to manufacturer's instructions  
380 (n=6-8 per group). Data were normalized with the protein amount of the samples.

381

382 **Mitochondrial DNA amount quantification**

383 Total DNA, including mitochondrial DNA, was extracted from approximately 10 mg of pulverized skeletal  
384 muscle and approximately 3 mg of pulverized liver from C26-F and VCM mice with the standard phenol-  
385 chloroform method followed by ethanol precipitation. The amount of mtDNA was determined as the ratio of  
386 mitochondrial rRNAs, 16s and cytochrome c oxidase subunit II (Cox2) genomic regions, to the geometric mean  
387 of nuclear uncoupling protein 2 (Ucp2) and hexokinase-2 (Hk2) genomic regions using RT-qPCR. Primer  
388 sequences are listed in Supplementary Table X. RT-qPCR was carried out in triplicates with 2 ng of template  
389 DNA per well using Maxima SYBR Green qPCR Master Mix (ThermoFisher Scientific) and the CFX Connect  
390 Real-Time PCR Detection System (Bio-Rad). Data analysis was conducted with standard curve method with  
391 qBASE+ software (Biogazelle).

392

393 **RNA isolation and RT-qPCR analysis**

394 Approximately 30 mg of GSN muscle and liver were lysed and processed to isolate high-quality RNA  
395 using the standard phenol-chloroform method. RNA concentration was quantified by means of  
396 spectrophotometry. Total RNA was retro-transcribed using a cDNA synthesis kit (Bio-Rad, Hercules, CA, USA  
397 or Qiagen, Hilden, Germany) and transcript levels were determined by RT-qPCR using the SsoAdvanced  
398 SYBR Green Supermix (Bio-Rad) or Maxima SYBR Green qPCR Master Mix (ThermoFisher Scientific) and the  
399 CFX Connect Real-Time PCR Detection System (Bio-Rad) with 10 ng of cDNA per well. Every RT-qPCR was  
400 validated by analyzing the respective melting curve and run in parallel to no reverse transcriptase control (NRT)  
401 to exclude potential artifacts from genomic DNA contamination. Gene expression was normalized to the  
402 geometric mean of housekeeping gene expression and represented as relative expression according to primer  
403 efficiency assessed using serial dilutions of pooled samples (standard curve method). Data analysis was  
404 conducted in Microsoft Excel and qBASE+ software (Biogazelle). As for human muscle biopsies, total RNA  
405 was extracted from approximately 20 mg of rectus abdominal muscle using TRIzol (Thermo Fisher Scientific).  
406 1 ug of RNA was reverse transcribed using the SuperScript IV Reverse Transcriptase (Thermo Fisher  
407 Scientific). Gene expression was analyzed by qRT-PCR using the PowerUp SYBR Green Master Mix (Applied

408 Biosystems). Data were normalized to *Actb* gene expression. Primer sequences are listed in Supplementary  
409 Table 4.

410

#### 411 **Western blotting**

412 Approximately 50 mg of GSN muscle and liver were mechanically homogenized using bead  
413 homogenizer in RIPA buffer (50 mM Tris-HCl pH 8.0, 5 mM EDTA pH 8.0, 1% Igepal CA-630, 0.5% sodium  
414 deoxycholate, 0.1% SDS) containing protease inhibitors (0.5 mM PMSF, 0.5 mM DTT, 2 µg/ml leupeptin, 2  
415 µg/ml aprotinin) and phosphatase inhibitors (P0044). Next, homogenates were sonicated for 10 s at low  
416 intensity, centrifuged at 15000 g for 5 min at 4°C and the supernatant was collected. Total protein concentration  
417 was quantified with Bradford reagent (Bio-Rad) using BSA as protein concentration standard. Equal amounts  
418 of protein (10-30 µg) were heat-denatured (except when assessing OXPHOS expression) in sample-loading  
419 buffer (50 mM Tris-HCl, pH 6.8, 100 mM DTT, 2% SDS, 0.1% bromophenol blue, 10% glycerol), resolved by  
420 SDS-PAGE electrophoresis (4561086, Bio-Rad) and transferred to nitrocellulose membranes (1704159, Bio-  
421 Rad). The filters were blocked with 5% nonfat dry milk in Tris-buffered saline containing 0.05% Tween (TBS-  
422 Tween) and then incubated overnight with antibodies directed against specific proteins: AMPK (07-181,  
423 Millipore), p-AMPK (#2535, Cell Signaling), GAPDH (G8795), LC3B (L7543), NRK2 (produced in Dr. Gareth  
424 G Lavery's lab), OXPHOS Antibody Cocktail (ab110413, Abcam), PGC-1α (ab3242, Merck Millipore), PINK1  
425 (SAB2500794), Puromycin (EQ0001, Kerofast), TOMM20 (ab186735, Abcam) and Vinculin (sc73614, Santa  
426 Cruz Biotechnology). Peroxidase conjugated IgGs (Bio-Rad) were used as secondary antibodies. Three 5 min  
427 washes with TBS-Tween were performed after each antibody incubation. After incubation with Clarity Western  
428 ECL substrate (170-5061, Bio-Rad), bands were developed using the ChemiDoc XRS+ imaging system (Bio-  
429 Rad). Densitometric analysis on the obtained images was performed using the Image Lab software (Bio-Rad).

430

#### 431 **Data representation and statistics**

432 Data are presented using bar (mean) and dot plots (individual values) unless differently stated. Data  
433 representation and statistical tests were performed with Prism (version 9, GraphPad) software. Outliers were  
434 identified using ROUT (Q=1%) and excluded from the analysis. The normality of distributions was evaluated  
435 by the Shapiro-Wilk test. Unless differently stated in the figure legend, the significance of the differences was  
436 evaluated by appropriate two-sided statistical tests: Student's "t"-test or analysis of variance (ANOVA) for  
437 normal distribution and Mann-Whitney test or Kruskal-Wallis test for non-normal distribution. ANOVA was

438 followed by the Fisher's Least Significant Difference (LSD) test, whereas the Kruskal–Wallis test was followed  
439 by the Uncorrected Dunn's test to assess differences of planned comparisons among groups.

440

## 441 REFERENCES

- 442 1. Fearon, K. *et al.* Definition and classification of cancer cachexia: an international consensus. *Lancet.*  
443 *Oncol.* **12**, 489–95 (2011).
- 444 2. Rohm, M., Zeigerer, A., Machado, J. & Herzig, S. Energy metabolism in cachexia. *EMBO Rep.* **20**,  
445 (2019).
- 446 3. Argilés, J. M., Busquets, S., Stemmler, B. & López-Soriano, F. J. Cancer cachexia: understanding the  
447 molecular basis. *Nat. Rev. Cancer* **14**, 754–762 (2014).
- 448 4. Hulmi, J. J. *et al.* Muscle NAD<sup>+</sup> depletion and Serpina3n as molecular determinants of murine cancer  
449 cachexia—the effects of blocking myostatin and activins. *Mol. Metab.* **41**, 101046 (2020).
- 450 5. Zhang, H. *et al.* NAD<sup>+</sup> repletion improves mitochondrial and stem cell function and enhances life span  
451 in mice. *Science* **352**, 1436–43 (2016).
- 452 6. Ryu, D. *et al.* NAD<sup>+</sup> repletion improves muscle function in muscular dystrophy and counters global  
453 PARylation. *Sci. Transl. Med.* **8**, 361ra139 (2016).
- 454 7. Khan, N. A. *et al.* Effective treatment of mitochondrial myopathy by nicotinamide riboside, a vitamin B3.  
455 *EMBO Mol. Med.* **6**, 721–31 (2014).
- 456 8. Migliavacca, E. *et al.* Mitochondrial oxidative capacity and NAD<sup>+</sup> biosynthesis are reduced in human  
457 sarcopenia across ethnicities. *Nat. Commun.* **10**, 5808 (2019).
- 458 9. Fletcher, R. S. & Lavery, G. G. The emergence of the nicotinamide riboside kinases in the regulation  
459 of NAD<sup>+</sup> metabolism. *J. Mol. Endocrinol.* **61**, R107–R121 (2018).
- 460 10. Park, J. M., Han, Y. M., Lee, H. J., Park, Y. J. & Hahm, K. B. Nicotinamide Riboside Vitamin B3 Mitigated  
461 C26 Adenocarcinoma-Induced Cancer Cachexia. *Front. Pharmacol.* **12**, 665493 (2021).
- 462 11. Dollerup, O. L. *et al.* Nicotinamide riboside does not alter mitochondrial respiration, content or  
463 morphology in skeletal muscle from obese and insulin-resistant men. *J. Physiol.* **598**, 731–754 (2020).
- 464 12. Dollerup, O. L. *et al.* A randomized placebo-controlled clinical trial of nicotinamide riboside in obese  
465 men: safety, insulin-sensitivity, and lipid-mobilizing effects. *Am. J. Clin. Nutr.* **108**, 343–353 (2018).
- 466 13. Pirinen, E. *et al.* Niacin Cures Systemic NAD<sup>+</sup> Deficiency and Improves Muscle Performance in Adult-  
467 Onset Mitochondrial Myopathy. *Cell Metab.* **31**, 1078-1090.e5 (2020).
- 468 14. Wyart, E. *et al.* Metabolic Alterations in a Slow-Paced Model of Pancreatic Cancer-Induced Wasting.  
469 *Oxid. Med. Cell. Longev.* **2018**, 6419805 (2018).
- 470 15. Kuchelapati, M. H. *et al.* An Msh2 conditional knockout mouse for studying intestinal cancer and testing  
471 anticancer agents. *Gastroenterology* **138**, 993-1002.e1 (2010).
- 472 16. Sartori, R. *et al.* Perturbed BMP signaling and denervation promote muscle wasting in cancer cachexia.  
473 *Sci. Transl. Med.* **13**, (2021).
- 474 17. Xie, N. *et al.* NAD<sup>+</sup> metabolism: pathophysiologic mechanisms and therapeutic potential. *Signal*  
475 *Transduct. Target. Ther.* **5**, 227 (2020).
- 476 18. Ballarò, R. *et al.* Moderate exercise in mice improves cancer plus chemotherapy-induced muscle  
477 wasting and mitochondrial alterations. *FASEB J.* **33**, 5482–5494 (2019).



- 478 19. Beltrà, M., Pin, F., Ballarò, R., Costelli, P. & Penna, F. Mitochondrial Dysfunction in Cancer Cachexia:  
479 Impact on Muscle Health and Regeneration. *Cells* **10**, 3150 (2021).
- 480 20. Lee, Y. *et al.* PINK1 Primes Parkin-Mediated Ubiquitination of PARIS in Dopaminergic Neuronal  
481 Survival. *Cell Rep.* **18**, 918–932 (2017).
- 482 21. Liu, L. *et al.* Quantitative Analysis of NAD Synthesis-Breakdown Fluxes. *Cell Metab.* **27**, 1067-1080.e5  
483 (2018).
- 484 22. Fletcher, R. S. *et al.* Nicotinamide riboside kinases display redundancy in mediating nicotinamide  
485 mononucleotide and nicotinamide riboside metabolism in skeletal muscle cells. *Mol. Metab.* **6**, 819–  
486 832 (2017).
- 487 23. Doig, C. L. *et al.* Induction of the nicotinamide riboside kinase NAD<sup>+</sup> salvage pathway in a model of  
488 sarcoplasmic reticulum dysfunction. *Skelet. Muscle* **10**, 5 (2020).
- 489 24. Diguët, N. *et al.* Nicotinamide Riboside Preserves Cardiac Function in a Mouse Model of Dilated  
490 Cardiomyopathy. *Circulation* **137**, 2256–2273 (2018).
- 491 25. Sasaki, Y., Araki, T. & Milbrandt, J. Stimulation of nicotinamide adenine dinucleotide biosynthetic  
492 pathways delays axonal degeneration after axotomy. *J. Neurosci.* **26**, 8484–91 (2006).
- 493 26. Yamamoto, T. *et al.* Nicotinamide mononucleotide, an intermediate of NAD<sup>+</sup> synthesis, protects the  
494 heart from ischemia and reperfusion. *PLoS One* **9**, e98972 (2014).
- 495 27. Yoshino, J., Mills, K. F., Yoon, M. J. & Imai, S. Nicotinamide mononucleotide, a key NAD(+)   
496 intermediate, treats the pathophysiology of diet- and age-induced diabetes in mice. *Cell Metab.* **14**,  
497 528–36 (2011).
- 498 28. Tong, D. *et al.* NAD<sup>+</sup> Repletion Reverses Heart Failure With Preserved Ejection Fraction. *Circ. Res.*  
499 **128**, 1629–1641 (2021).
- 500 29. Gomes, A. P. *et al.* Declining NAD(+) induces a pseudohypoxic state disrupting nuclear-mitochondrial  
501 communication during aging. *Cell* **155**, 1624–38 (2013).
- 502 30. Purushotham, A. *et al.* Hepatocyte-specific deletion of SIRT1 alters fatty acid metabolism and results  
503 in hepatic steatosis and inflammation. *Cell Metab.* **9**, 327–38 (2009).
- 504 31. Mukhopadhyay, P. *et al.* Poly (ADP-ribose) polymerase-1 is a key mediator of liver inflammation and  
505 fibrosis. *Hepatology* **59**, 1998–2009 (2014).
- 506 32. Guarino, M. & Dufour, J.-F. Nicotinamide and NAFLD: Is There Nothing New Under the Sun?  
507 *Metabolites* **9**, (2019).
- 508 33. Kendrick, A. A. *et al.* Fatty liver is associated with reduced SIRT3 activity and mitochondrial protein  
509 hyperacetylation. *Biochem. J.* **433**, 505–14 (2011).
- 510 34. Zhou, C.-C. *et al.* Hepatic NAD(+) deficiency as a therapeutic target for non-alcoholic fatty liver disease  
511 in ageing. *Br. J. Pharmacol.* **173**, 2352–68 (2016).
- 512 35. Goodman, C. A. *et al.* Novel insights into the regulation of skeletal muscle protein synthesis as revealed  
513 by a new nonradioactive in vivo technique. *FASEB J.* **25**, 1028–39 (2011).
- 514 36. Martin, L. *et al.* Cancer cachexia in the age of obesity: skeletal muscle depletion is a powerful prognostic  
515 factor, independent of body mass index. *J. Clin. Oncol.* **31**, 1539–47 (2013).
- 516 37. Collino, M. *et al.* Oxidative stress and inflammatory response evoked by transient cerebral  
517 ischemia/reperfusion: effects of the PPAR-alpha agonist WY14643. *Free Radic. Biol. Med.* **41**, 579–89  
518 (2006).

519 38. Ballarò, R. *et al.* Moderate Exercise Improves Experimental Cancer Cachexia by Modulating the Redox  
520 Homeostasis. *Cancers (Basel)*. **11**, (2019).

521

522

### 523 **AUTHOR CONTRIBUTION**

524 Conceptualization, M.B., N.P., J.J.H., E.P. and F.P.; Formal Analysis, M.B. and N.P.; Investigation, M.B., N.P.,  
525 C.F., K.T., M.Y.H. and R.S.; Resources, S.Z., L.M., P.E.P., R.K., M.S. and R.S.; Writing – Original Draft, M.B.,  
526 N.P., E.P. and F.P.; Writing – Review & Editing, S.Z., P.E.P., M.S., J.J.H., and R.S.; Supervision, E.P. and  
527 F.P.; Funding Acquisition, E.P. and F.P.

528

### 529 **ACKNOWLEDGMENTS**

530 We are grateful to Dr. Gareth G Lavery (Department of Biosciences, Nottingham Trent University) who kindly  
531 donated the antibody against the NRK2 protein. Also, we thank Valentina Audrito (Department of Medical  
532 Sciences, University of Turin) for reviewing and advising on the first draft of the manuscript. This work was  
533 supported by Fondazione AIRC (IG 2018—ID. 21963 project, PI: F.P.), the Finnish Cancer Foundation and  
534 Finnish Cancer Center FICAN South (PIs: E.P. and Dr Tommi Järvinen, respectively), and by two post-doctoral  
535 Fellowships from Fondazione Umberto Veronesi (ID2496 and ID3519 to R.S).

536

### 537 **COMPETING INTERESTS**

538 The authors declare no competing interests.

539 **FIGURE LEGENDS**

540 **Figure 1. NAD<sup>+</sup> depletion and Nr2 downregulation as hallmarks of cancer cachexia in the skeletal**  
541 **muscle.**

542 **a** NAD<sup>+</sup> levels in the skeletal muscle of C26-F (*n*=7), KPC (*n*=6) and VCM CC models (*n*=8). **b** RT-qPCR  
543 quantification of *Nrk2* gene expression in C26-F (*n*=6-7), KPC (*n*=5-6) and VCM (*n*=8) mice. Data are  
544 normalized to housekeeping gene expression and displayed as relative expression. **c, d** Representative  
545 western blotting bands and densitometry analysis of NRK2 protein levels on C26-F (*n*=6) and VCM (*n*=6-8)  
546 mice. GAPDH expression was used as loading control. Data are shown as means with individual values.  
547 Statistical analysis was performed using Student's t-test, \**P*<0.05, \*\**P*<0.01, \*\*\**P*<0.001. and n.s.: non-  
548 significant. A.U.; arbitrary units.

549 **Figure 2. Metabolome analysis in human muscle biopsies and serum according to NRK2 expression.**

550 **a** Relative expression of *NRK2* transcript in *rectus abdominis* muscle biopsies from healthy volunteers (*n*=28)  
551 and cancer patients stratified in pre-cachectic (*n*=49) and cachectic (*n*=53) assessed by RT-qPCR. **b** Relative  
552 gene expression of *NRK2* in healthy volunteers (*n*=10; grey), high *NRK2*-expressing (*n*=10; orange) and low  
553 *NRK2*-expressing (*n*=10; blue) groups. **c** Weight loss percentage in the previous 6 months before biopsy  
554 collection from patients with high or low *NRK2* expression that were selected for metabolome analysis.  
555 Statistical analysis was performed using Kruskal-Wallis test with adjustment for multiple testing (Benjamini,  
556 Krieger and Yekutieli): \**P*<0.05, \*\**P*<0.01, \*\*\**P*<0.001 and n.s.: non-significant. **d** Heatmap highlighting the  
557 abundancy of all the detected metabolites in muscle biopsies. Color represents the mean Z score of each  
558 group. **e** Schematic illustration presenting the relative abundance of metabolites categorized in the "glycolysis"  
559 and the "Kreb's Cycle" pathways. Numbers in boxes represent fold change of either high *NRK2* (orange) or  
560 low *NRK2* (blue) groups compared to healthy volunteers for each metabolite. **f-h** Relative abundance of  
561 metabolites detected in muscle samples categorized as **(f)** "redox", **(g)** "nucleotides", and **(h)** "amino acids". **i**  
562 Relative abundance of detectable metabolites in the sera. Data display: **a-c** are means with individual values,  
563 **e** are fold change vs Healthy group, **f-i** are relative abundance ± SEM vs Healthy group (dotted line). PCA;  
564 pyroglutamate, NAA; N-acetyl aspartate, A.U.; arbitrary units.

565 **Figure 3. Effects of NA treatment on muscle mass, muscle function and protein metabolism in CC**  
566 **mouse models.**

567 **a** Study design of the C26-F model and NA treatment with three experimental groups: control (*n*=6-7), C26-F  
568 (*n*=7) and C26-F+NA (*n*=6-7). **b** NAD<sup>+</sup> levels of control, C26-F and C26-F+NA groups represented as pmol/mg

569 of muscle weight **c, d** *Tibialis anterior* (TA) and *gastrocnemius* (GSN) muscle wet weight normalized by initial  
570 body weight (IBW). **e** Grasping strength at the start of NA treatment and the day after every Folfox  
571 administration. **f-i** Representative western blotting bands (**f**) and densitometry analysis of puromycin  
572 incorporation (SUnSET analysis) (**g**), LC3B-II normalized to total LC3B (**h**) and p-AMPK normalized to total  
573 AMPK (**i**) protein levels. GAPDH protein expression was used as loading control. **j** Experimental design of the  
574 VCM model and NA treatment with three experimental groups: control ( $n=8$ ), VCM ( $n=8$ ) and VCM + NA ( $n=6$ ).  
575 **k** NAD<sup>+</sup> levels of control, VCM and VCM+NA groups represented as pmol/mg of muscle weight. **l-n** TA, GSN  
576 and *quadriceps femoris* (QUAD) muscle wet weight. **o, p** Representative western blotting bands (**o**) and  
577 densitometry analysis of LC3B-II normalized to total LC3B (**p**) protein levels. GAPDH protein expression was  
578 used as loading control. Data are shown in panels **b-d, g-i, k-n** and **p** as means with individual values and in  
579 panel **e** as means  $\pm$  SEM ( $n=7$ ). Statistical analysis was performed using ANOVA + Fisher's LSD test. \* $P<0.05$ ,  
580 \*\* $P<0.01$  and \*\*\* $P<0.001$ . NA; niacin, A.U.; arbitrary units.

581 **Figure 4. Impact of NA on skeletal muscle mitochondrial respiratory capacity and markers of**  
582 **mitochondrial biogenesis in CC mouse models.**

583 **a-f** Assays run on *gastrocnemius* (GSN) muscle from control ( $n=6-7$ ), C26-F ( $n=7$ ) and C26-F + NA ( $n=7$ )  
584 groups: **a** representative western blotting bands for PGC-1 $\alpha$ , TOMM20, OXPHOS complex subunits (ATP5,  
585 UQCRC2, MTCO1, SDHB and NDUF88), PINK1 and GAPDH; **b** expression of PGC-1 $\alpha$  protein as assessed  
586 by densitometry analysis of western blotting bands. GAPDH protein expression was used as loading control;  
587 **c** mtDNA amount presented as a ratio of mtDNA genome to nuclear DNA genome; **d-f** Expression of TOMM20  
588 protein (**d**), OXPHOS proteins (**e**) and PINK1 (**f**) as assessed by densitometry analysis of western blotting  
589 bands (**a**). GAPDH protein expression was used as loading control. **g-l** Assays run on GSN muscle from control  
590 ( $n=8$ ), VCM ( $n=8$ ) and VCM + NA ( $n=5-6$ ) groups: **g** representative western blotting bands for PGC-1 $\alpha$ ,  
591 TOMM20, OXPHOS complex subunits, PINK1 and GAPDH; **h** expression of PGC-1 $\alpha$  protein as assessed by  
592 densitometry analysis of western blotting bands (**g**). GAPDH protein expression was used as loading control;  
593 **i** mtDNA amount presented as a ratio of mtDNA genome to nuclear DNA genome; **j-l** Expression of TOMM20  
594 protein (**j**), OXPHOS proteins (**k**) and PINK1 (**l**) as assessed by densitometry analysis of western blotting  
595 bands. GAPDH protein expression was used as loading control. Data are shown as means with individual  
596 values. Statistical analysis was performed with ANOVA + Fisher's LSD for normally distributed data and with  
597 Kruskal-Wallis + Uncorrected Dunn's test for non-normal data. \* $P<0.05$ , \*\* $P<0.01$  and \*\*\* $P<0.001$ . NA; niacin,  
598 A.U.; arbitrary units.

599 **Figure 5. Impact of NA on hepatic NAD<sup>+</sup> and mitochondrial metabolism in CC mouse models.**

600 **a-d** Assays run on frozen liver from from control ( $n=6-7$ ), C26-F ( $n=7$ ) and C26-F + NA ( $n=7$ ) groups: **a** hepatic  
601 NAD<sup>+</sup> levels as pmol normalized to liver weight; **b** mtDNA amount presented as a ratio of mtDNA genome to  
602 nuclear DNA genome; **c** Representative western blotting bands of TOMM20, OXPHOS complex subunits  
603 (ATP5, UQCRC2, MTCO1, SDHB and NDUF88) and Vinculin; **d** Expression of TOMM20 and OXPHOS  
604 proteins as assessed by densitometry analysis of western blotting bands (**c**). Vinculin protein expression was  
605 used as loading control. **e-h** Assays run on frozen liver from control ( $n=6-8$ ), VCM ( $n=8$ ) and VCM + NA ( $n=6$ )  
606 groups: **e** hepatic NAD<sup>+</sup> levels as pmol normalized to liver weight; **f** mtDNA amount presented as a ratio of  
607 mtDNA genome to nuclear DNA genome; **g** Representative western blotting bands of TOMM20, OXPHOS  
608 complex subunits (ATP5, UQCRC2, MTCO1, SDHB and NDUF88) and Vinculin; **h** Expression of TOMM20  
609 and OXPHOS proteins as assessed by densitometry analysis of western blotting bands (**g**). Vinculin protein  
610 expression was used as loading control. Data are shown as means with individual values. Statistical analysis  
611 was performed with ANOVA + Fisher's LSD for normally distributed data and with Kruskal-Wallis + Uncorrected  
612 Dunn's test for non-normal data. \* $P<0.05$ , \*\* $P<0.01$  and \*\*\* $P<0.001$ . NA; niacin, A.U.; arbitrary units.

613

614 **Figure 6. Graphical representation of the main finding of this study**

615 Observations in cancer patients confirm the data obtained in three distinct murine models of experimental  
616 cancer cachexia and are supported by positive results in the intervention study involving severe (C26-F) and  
617 chronic (VCM) cancer cachexia. The beneficial effects produced by niacin on NAD content, mitochondrial  
618 homeostasis and energy metabolism are generalized despite model specific alterations are present.

**Fig. 1**

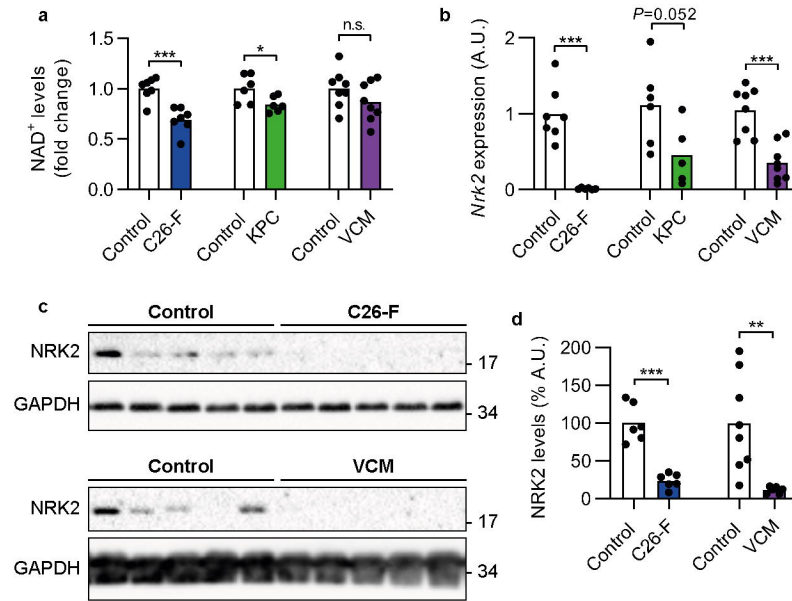

**Fig. 2**

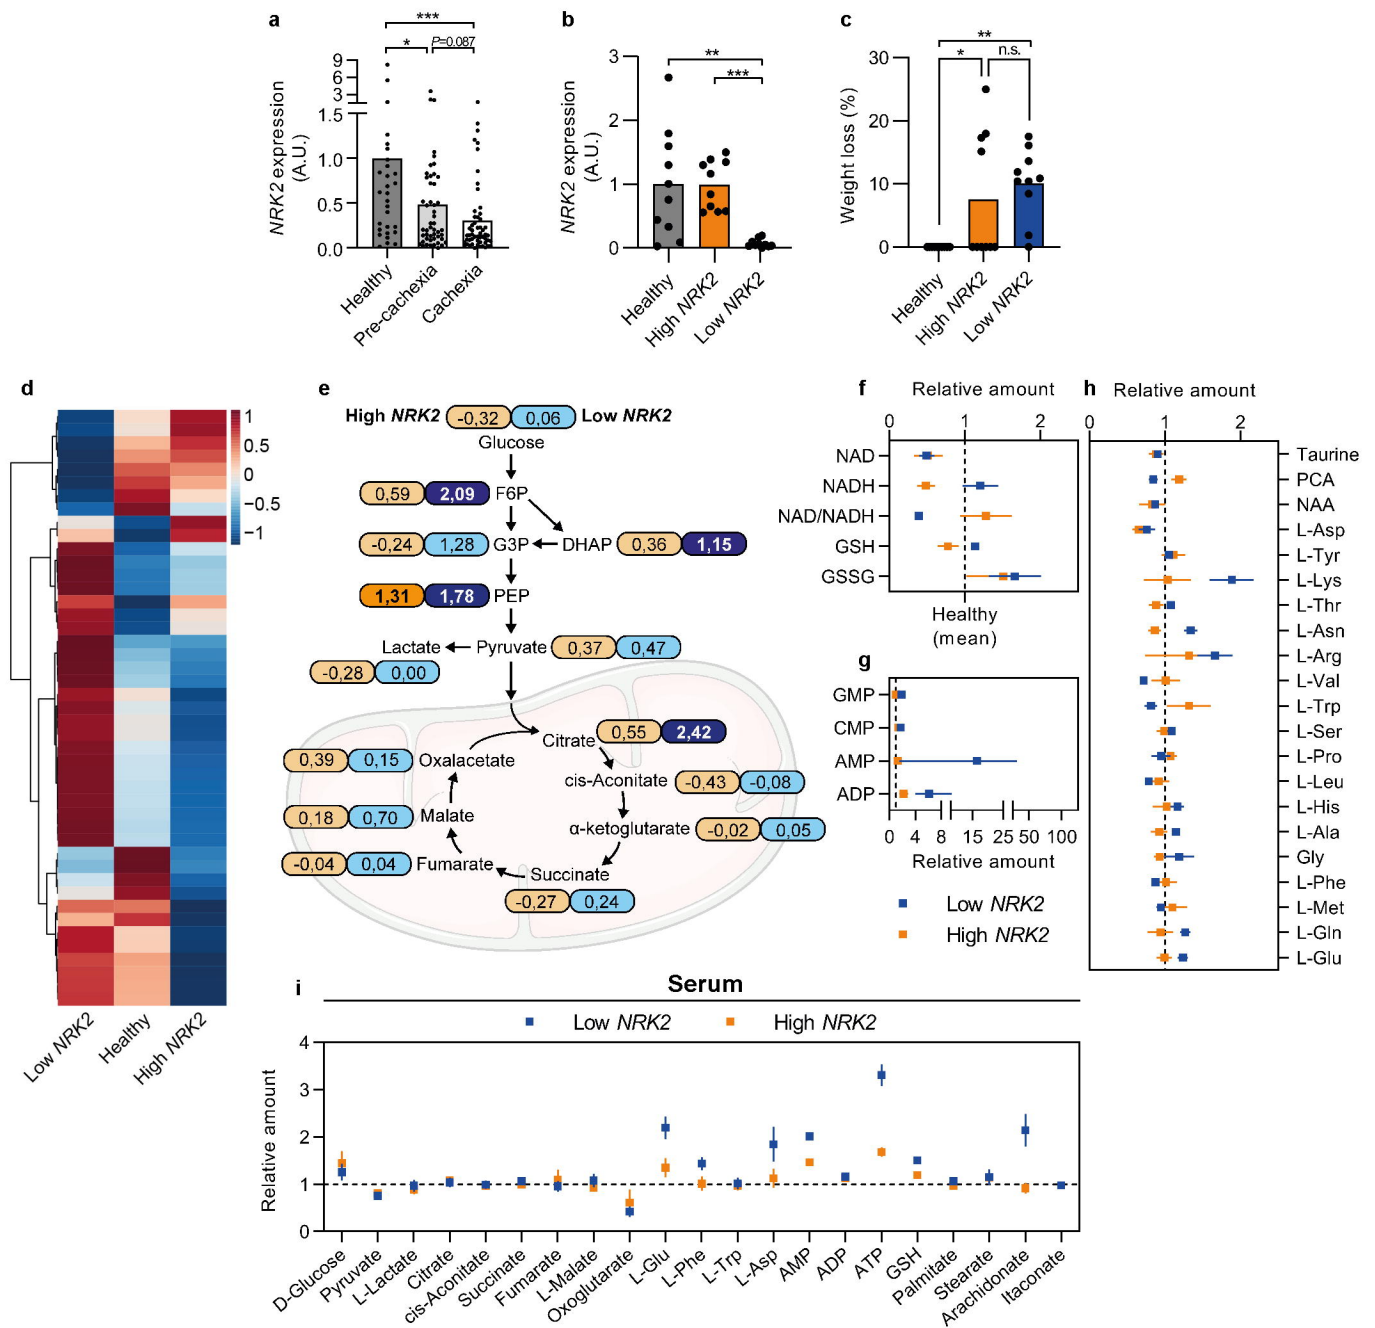

**Fig. 3**

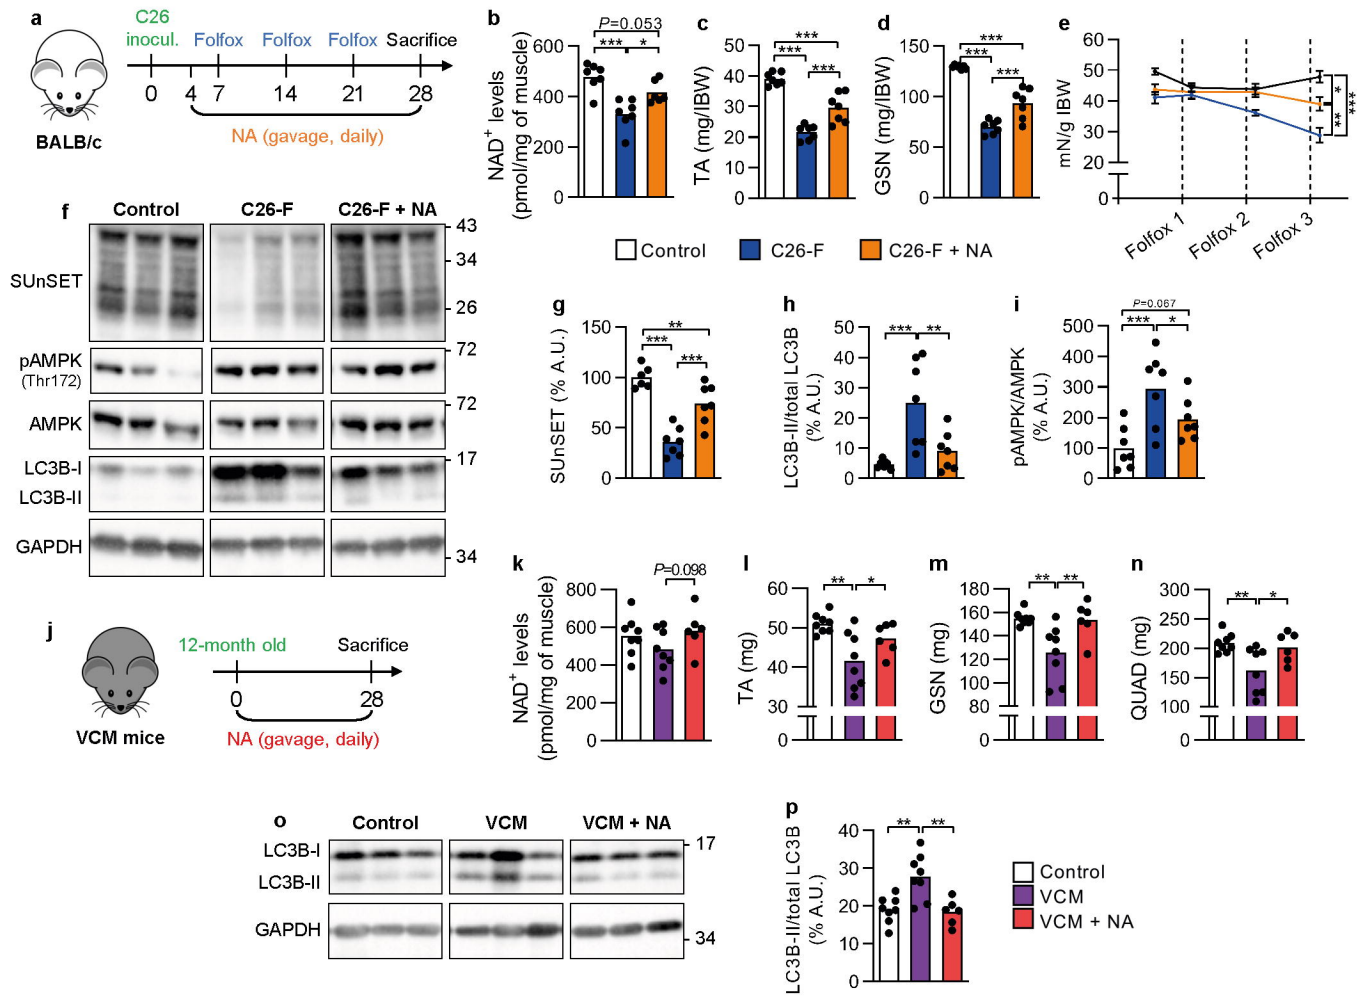



**Fig. 4**

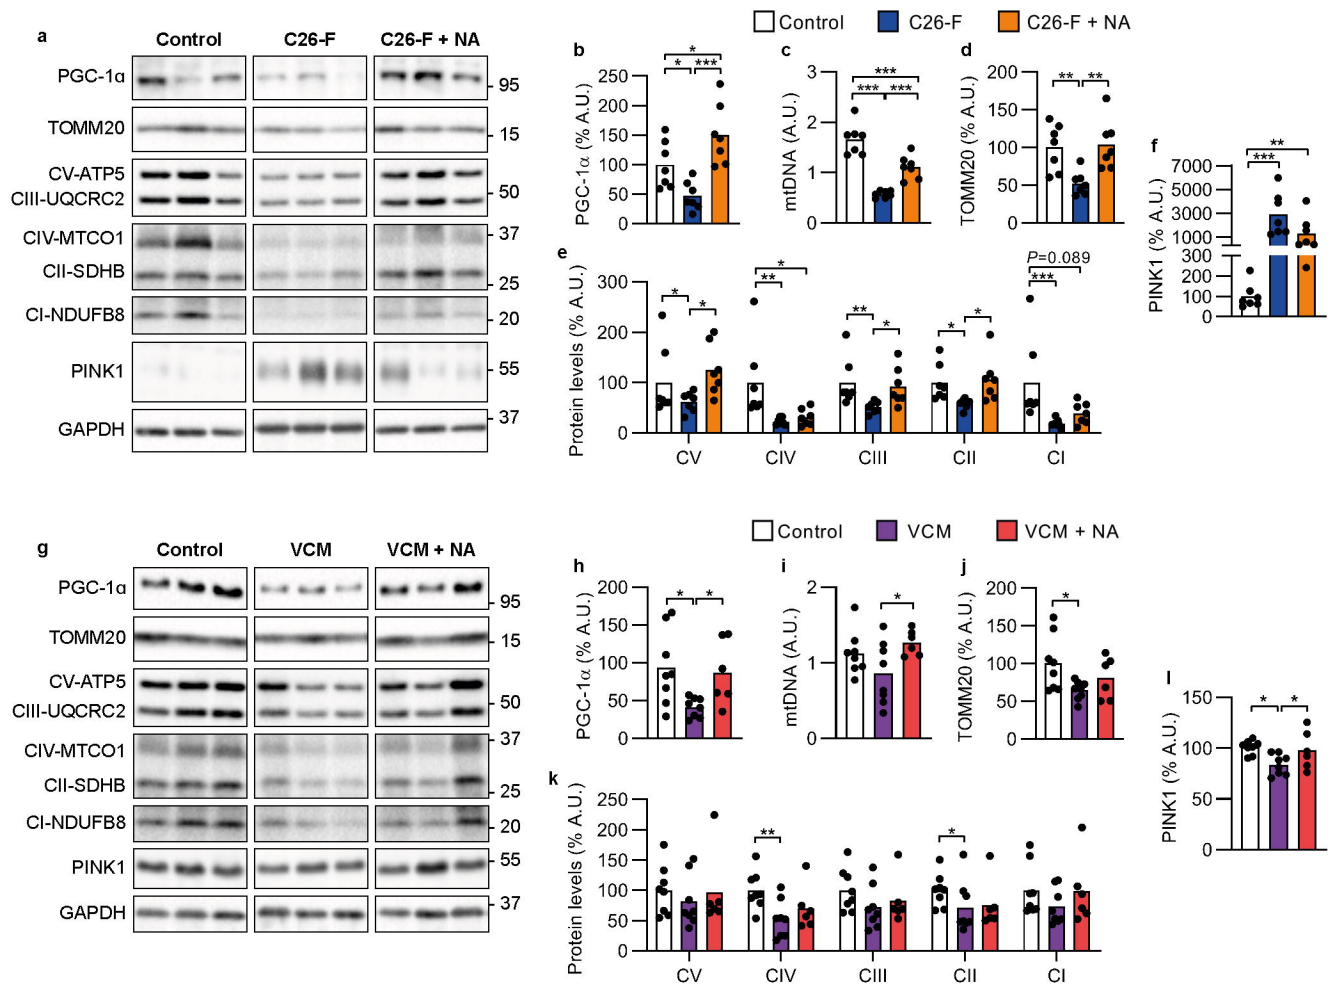

**Fig. 5**

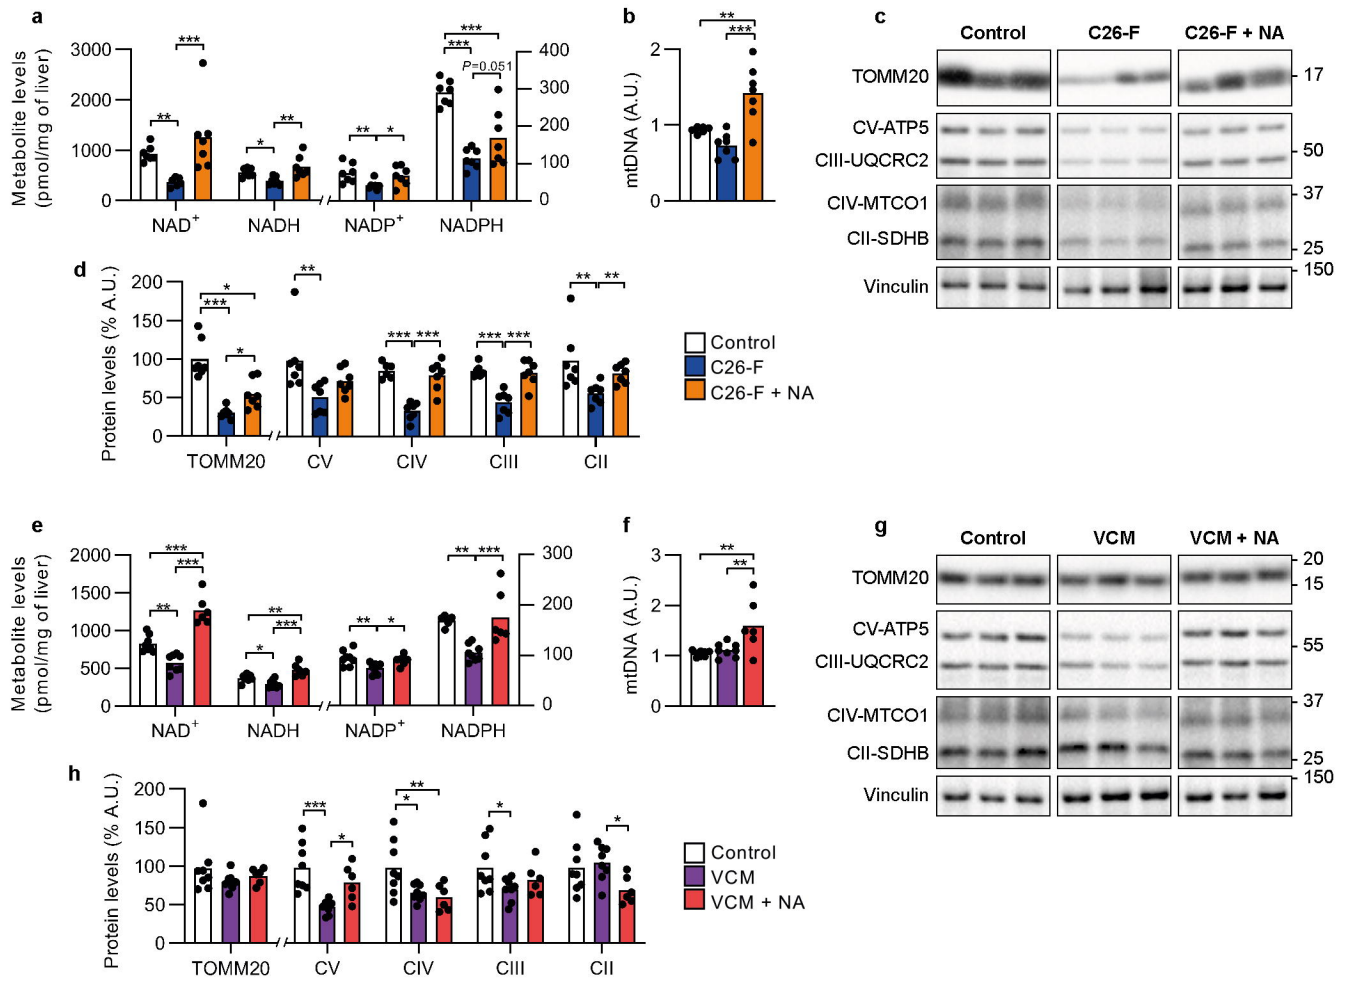

**Fig. 6**

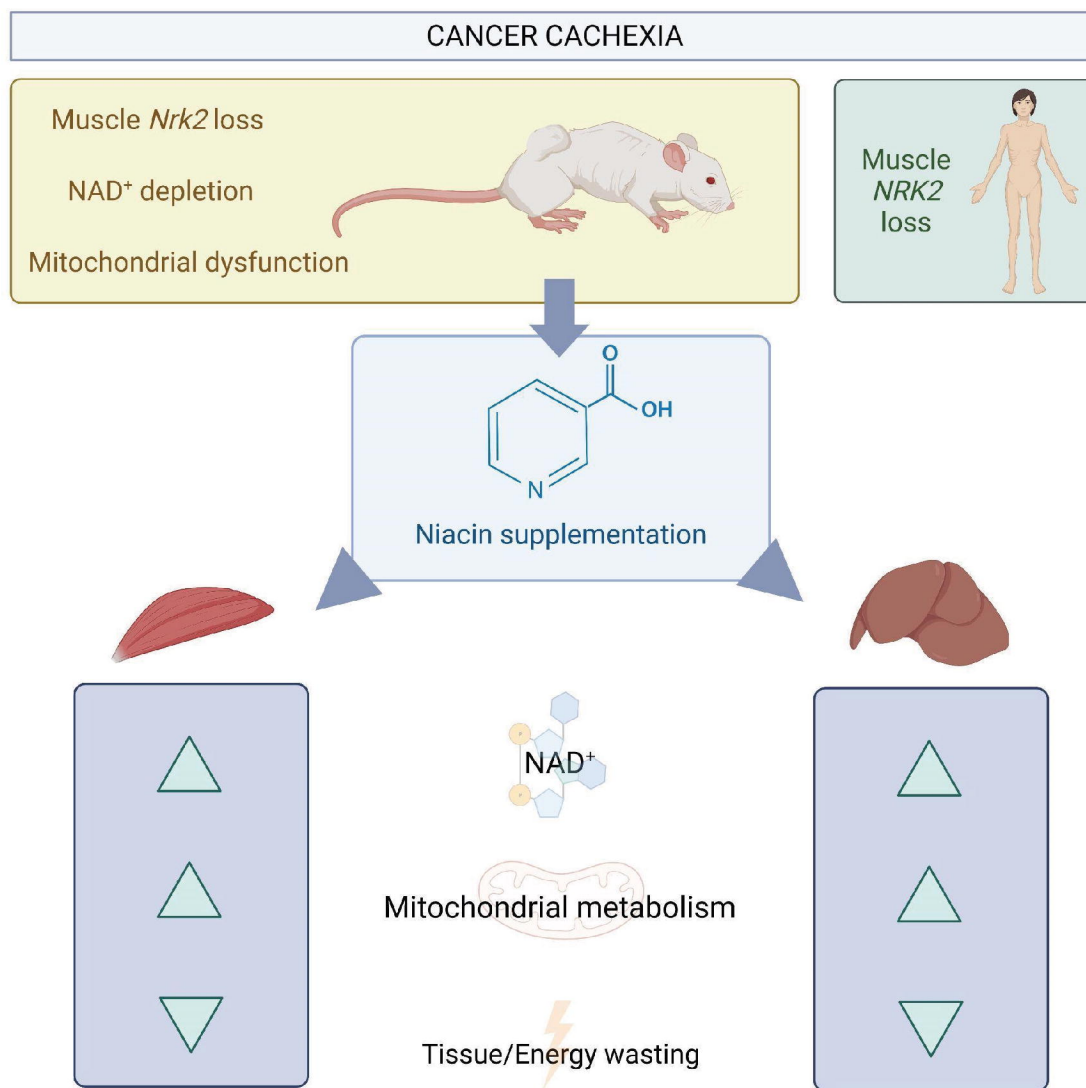

Source: http://biorxiv.org/content/10.1101/2022.07.06.499010v1.full.pdf
